# Supplementary material
Source: PubMed Central journal article supplement (PMC5973794)

**Supplemental Figure 1. TSP2 promoter activity is decreased in the presence of DETANO.** (A) Diagram of the luciferase constructs generated to assay the TSP2 promoter. The open box indicates the first exon of TSP1 and the dash denotes the putative transcriptional start site (TSS). (B) Luciferase constructs were co-transfected with SV40 renilla in NIH3T3 fibroblasts in the absence (white bars) and presence (hatched bars) of 1mM DETANO for 24hrs. Promoter activity was lost between 150bp and 50bp. Every active plasmid exhibited decreased luciferase activity in the presence of 1mM DETANO. (C) Luciferase constructs generated by 3' to 5' deletions from the 1kb luciferase plasmid were co-transfected with SV40 renilla in NIH3T3 fibroblasts in the absence (white bars) and presence (hatched bars) of 1mM DETANO for 24hrs. Every active plasmid exhibited decreased luciferase activity in the presence of 1mM DETANO.

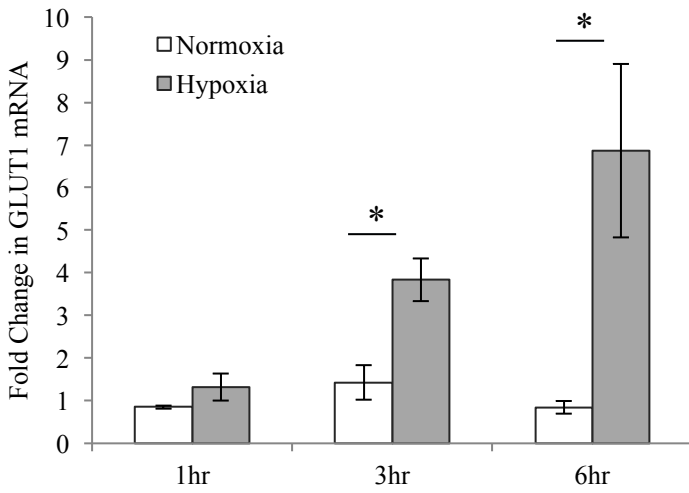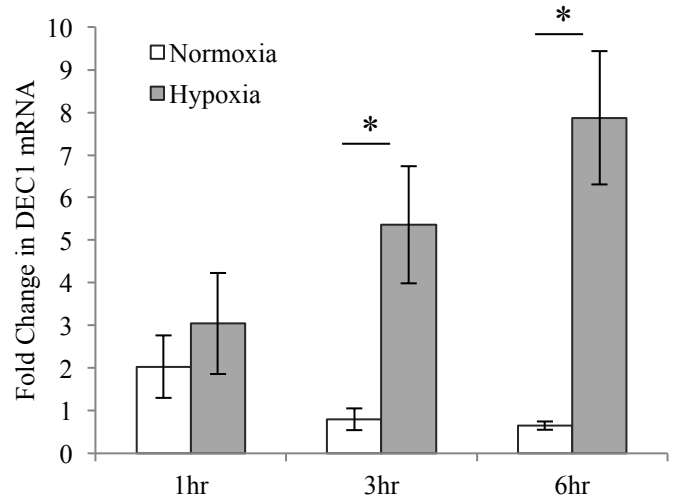

**Supplemental Figure 2. TSP2 promoter activity is decreased in the presence of DETANO.** (A) Diagram of the luciferase constructs generated to assay the TSP2 promoter. The open box indicates the first exon of TSP1 and the dash denotes the putative transcriptional start site (TSS). (B) Luciferase constructs were co-transfected with SV40 renilla in NIH3T3 fibroblasts in the absence (white bars) and presence (hatched bars) of 1mM DETANO for 24hrs. Promoter activity was lost between 150bp and 50bp. Every active plasmid exhibited decreased luciferase activity in the presence of 1mM DETANO. (C) Luciferase constructs generated by 3' to 5' deletions from the 1kb luciferase plasmid were co-transfected with SV40 renilla in NIH3T3 fibroblasts in the absence (white bars) and presence (hatched bars) of 1mM DETANO for 24hrs. Every active plasmid exhibited decreased luciferase activity in the presence of 1mM DETANO.

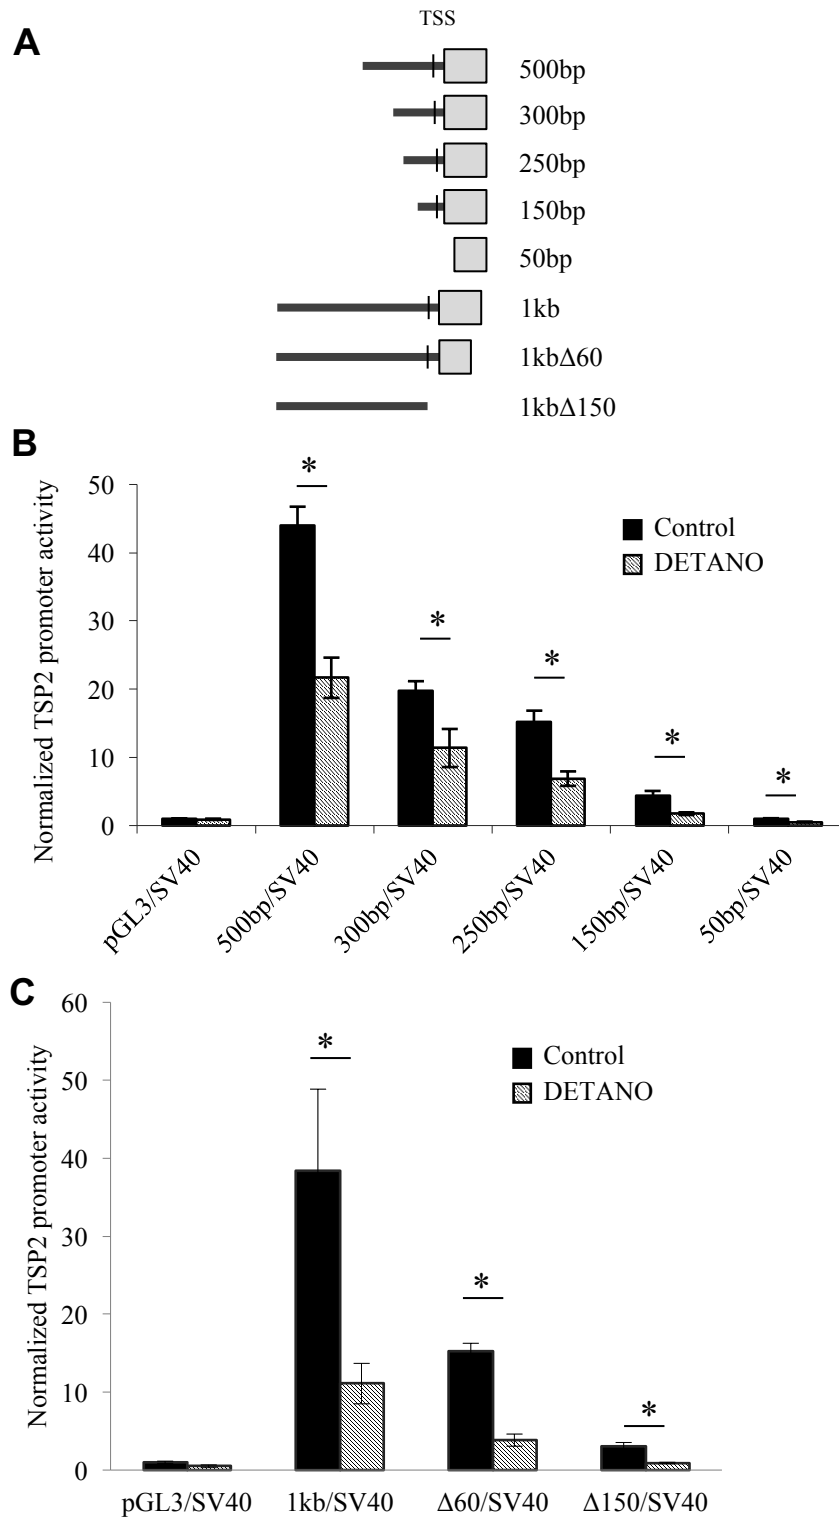

**Supplemental Figure 3: Immunohistochemical analysis of WT sham and TSP2 KO ischemic muscle.** (A, B) Representative images of tissues from sham treated WT (A) and d7 HLI TSP2 KO (B) stained for TSP2 and visualized with the peroxidase reaction (brown color) are shown. Nuclei were counterstained with methyl green. Scale bars = 200 mm (A) and 100 mm (B). Experiments in negative controls were done twice.

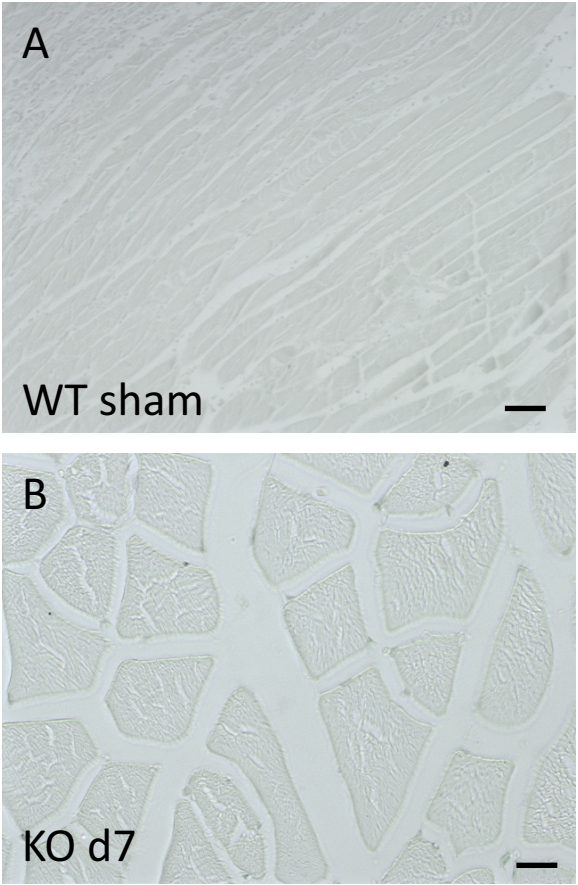

Supplement: NIHMS968545-supplement-Supplemental.pdf [file NIHMS968545-supplement-Supplemental.pdf]
